# Supplementary material for: Investigating the antibacterial potency of Schiff base derivatives as potential agents for urinary tract infection: DFT, solvation, molecular docking and pharmacokinetic studies
Source: publisher site journal article supplement (doi:10.1515/zpch-2024-0910), 2024-11-14
Supplement: Supplementary file 1 [file j_zpch-2024-0910_suppl_001.docx]

**Investigating the antibacterial potency of Schiff base derivatives as potential agents for urinary tract infection: DFT, solvation, molecular docking and pharmacokinetic studies**

**Obinna C. Godfrey1* Godwin Edo2, Magnus C. Nwoko 3, Alpha O. Gulack2, Gideon A. Okon 4, and Moses M. Edim5**

**1** Department of Biochemistry, University of Calabar, Calabar, Nigeria

**2** Department of Science Laboratory Technology, University of Calabar, Calabar, Nigeria

3 Department of Biology, Federal University of Technology, Owerri, Nigeria

**4** Department of Chemical Sciences, Clifford University, Umuahia Nigeria

5 Department of Chemistry, Cross River University of Technology, Calabar Nigeria

*Corresponding author’s email: [godfreyobinna@yahoo.com](mailto:godfreyobinna@yahoo.com)

# SUPPORTING INFORMATION

**Table S1:** The tabulated natural perturbation orbital analysis of the BDP compound in various solvents and their respective energy transitions at the DFT/ωB97XD/6-311++G(2d,2p) level of theory

| **COMPLEXES** | **Transition** | **Donor NBO (i)** | **Occupancy** | **Acceptor NBO (j)** | **Occupancy** | **E(2)**  **kcal/mol** | **E(j)-E(i)**  **a.u.** | **F(i,j) a.u** |
| --- | --- | --- | --- | --- | --- | --- | --- | --- |
| BDP_GAS | π* → π*  π* → π*  LP → π* | BD*(2) C30 - C32  BD*(2) C30 - C32  LP (2) N20 | 0.41675  0.41675  1.53952 | BD*(2) C35 - C37  BD*(2) C31 - C33  BD*(2) C30 - C32 | 0.34540  0.30834  0.41675 | 390.37  202.39  59.47 | 0.01  0.02  0.32 | 0.100  0.097  0.125 |
| BDP_WATER | π* → π*  LP → σ*  π → π* | BD*(2) C2 - C3  LP (3) O21  BD (2) C4 - C5 | 0.36802  1.78491  1.65604 | BD*(2) C1 - C6  BD*(1) C15 - N20  BD*(2) C2 - C3 | 0.29525  0.16987  0.36802 | 397.22  52.74  37.57 | 0.01  0.56  0.39 | 0.099  0.155  0.108 |
| BDP_DMSO | π* → π*  LP → σ*  π* → π* | BD*(2) C2 - C3  LP (3) O21  BD*(2) N12 - N13 | 0.36792  1.78330  0.13711 | BD*(2) C1 - C6  BD*(1) C15 - N20  BD*(2) C2 - C3 | 0.29540  0.17139  0.36792 | 400.61  53.24  40.71 | 0.01  0.56  0.03 | 0.099  0.155  0.066 |
| BDP_ETHANOL | LP → σ*  π* → π*  π → π* | LP (3) O21  BD*(2) N12 - N13  BD (2) C4 - C5 | 1.77970  0.13708  1.65636 | BD*(1) C15 - N20  BD*(2) C2 - C3  BD*(2) C2 - C3 | 0.17481  0.36769  0.36769 | 54.37  40.79  37.50 | 0.55  0.03  0.39 | 0.157  0.066  0.108 |
| BDP_METHANOL | π* → π*  LP → σ*  π* → π* | BD*(2) C2 - C3  LP (3) O21  BD*(2) N12 - N13 | 0.36781  1.78154  0.13708 | BD*(2) C1 - C6  BD*(1) C15 - N20  BD*(2) C2 - C3 | 0.29556  0.17307  0.36781 | 404.38  53.80  40.75 | 0.01  0.55  0.03 | 0.099  0.156  0.066 |
